# Supplementary material
Source: publisher figshare collection journal article supplement (https://tandf.figshare.com/ndownloader/files/24713602)
Supplement: Supplementary file 1 [file 24713602]

>sexaurelia_RILP1

MYNSS-IPQLPQASIYEPTISVQKIQPHYRFDSNNMPKIQCYYHQDNPNNLIKYFCRQRECLMPLCDKCYQQHVNQDHAS

TQSNIVPYETILSEIYQNIAADSNEMCDQINKIQQLSERTTTDKLVGKQSLQTNPNKLIDSARDQVIAIVNNYFDTLKTY

LLTQIDEPLPDLNVKPLIKDLKTRWEQNIKDLESINTQGASLEKVIEYCEEELRKRNDKILNEADKIIKILEAQTPQYRQ

YGVDIPQLFVDPSFLPRFLWVLERYAYFNRPPLEPEVLPPPRIVDPIPIYDM----PPPPRYYEPYPPPLEQVVYRDPIV

IREPVFRDSLIRENEYQEDFD-DAYWQRRNRGRQYQQSQYDFYPDNENEVY-DMKSVSK--EKKRKSKAQE-SPKPRYKI

TEHYESQKKKRQVNQKDQKKLLLVMHNHHT--------------------------------------------------

-------------------------------

>quadecaurelia_RILP2

MNNTS-IPQLPQASIYEPTISIQKIQPHYRFDSNNMPKIQCYYHQDNPNNYIKYFCRQPECLMPLCDKCIQQHISQYHTQ

TQSNIIPYETILSEIYQNLSADCNEMCDQIIKIQQLSESTTTDKLISKQSLQTNPIKLIESARDQVIAIVNNYFETLKTY

LLTQIEEPLPDINVKPAIKDLKQKWETNIKDLESINNPMTSIEKVIEYCEEELRKKNDNILNEAERLIKLLETATPQYRQ

YGVDIPQLFVDPSFLPRFLWVLERYAFFNHPPLEPEILPPPRIIDPIPVFDI----PPPPRYYDPYPPPMEQVVYRDPIV

IREPVFRDSLIRENEYQENFD-DAYWQRYNRGRQ----QYGYFNDNENDTY-QRKSVSKEKEKRRKSKVQE---SPLLKI

TEQYETQKKKKTNKSKGPKEII-VNHPQQSYVNVITPQQQQLLQQQQQLLLQQQSQQYQTLQTSPYLVQNNSQVPQTANI

LKSNNNLTDQTYKAPSGMTKSKITNQAYKAI

>quadecaurelia_RILP1

MNNSS-IPQLPQASIYEPTISVQKIQPHYRFDSNNMPKIQCYYHQESPNNYIKYFCRQPECLMPLCEKCIQQHINQYHTQ

TQSNIIPFESILSEIYQNLAADCNEMCDQINKIQVLSEKTTTDKLVGKQSLQTNPIKLIESARDQVIAIVNNYFETLKTY

LLAQIEEPLPDINVKPAIKDLKIKWEQNIKDLESINNPVASIEKVIEYCEEELRKKNDTILNDADKLIKILEAATPQYRQ

YGVDIPQLFVDPSFLPRFLWVLERYAFFNRPPLEPEVLPPPRIVEQIPVYDL----PPPPRYYDPY-PPMDQVVYRDPIV

IREPVFRDSLIRENEYQDDID-DADWQRRYRGRQQF-QNQGYYPEYENDSI-QKKSVSK--ERKRKSKVQE-SPSPLYRI

TEQYESKKKQKTSKSKGPKEIV-ISHAQPSYLNVTTTQIPQQTMQNQQ---------------TTYQVQPTIQNFQTSNV

LAPINTQLDLNSKAPLGMTKSKITNQAYKNT

>jenningsi_RILP1

MNNSS-IPQLPQASIYEPTISVQKIQPHYRFDSNNMPKIQCYYHQDSPNNYIKYFCRQPECLMPLCDKCVQHHLNQYHTQ

TQSNIVPLETILSEIYQNLAADCNEMCDQINKIQQLSERTTTDKLVGKQSLQTNPNKLIDSARDQVIAIVNNYFDTLKTY

LLTQIEEPLPDLNVKPAIKDLKLRWEQNIKDLESINNPVASIEKVIEYCEEELRKKNDTILNEAEKLIKLLETATPQYRQ

YGVDIPQLFVDPSFLPRFLWVLERYAFFNRPPLEPEVLPPPRIVEQIPVYDIPLPPPPPARYYEPY-PPMDQVVYRDPIV

IREPVFRDSLIRENEYQEDFD-DAYWQRRNRGRPQQ--QYDFYNDNENDGFQQMKSVSK--EKRKKSKAQE-SPKPRYKV

TEHYESQKKKKTNKSKGPKEIV-ISHAQPSYMNFTTTQIPQTTTYQPQ------------PQTTTYQAQPTYQALQTANI

LLPTNTQLDQSQKGTSGMTKSKITNQAYKNL

>jenningsi_RILP2

MNNSS-IPQLPQASIYEPTISVQKIQPHYRFDSNNMPKIQCYYHQDSPNNYIKYFCRQPECLMPLCDKCVQHHLNQYHTQ

TQSNIVPLETILSEIYQNLAADCNEMCDQINKIQQLSERTTTDKLVGKQSLQTNPNKLIDSARDQVIAIVNNYFDTLKTY

LLTQIEEPLPDLNVKPAIKDLKLRWEQNIKDLESINNPVASIEKVIEYCEEELRKKNDTILNEAEKLIKLLETATPQYRQ

YGVDIPQLFVDPSFLPRFLWVLERYAFFNRPPLEPEVLPPPRIVEQIPVYDIPLPPPPPARYYEPY-PPMDQVVYRDPIV

IREPVFRDSLIRENEYQEDFD-DAYWQRRNRGRPQQ--QYDFYNDNENDGFQQMKSVSK--EKRKKSKAQE-SPKPRYKV

TEHYESQKKKKTNKSKGPKEIV-ISHAQPSYMNFTTTQIPQTTTYQPQ------------PQTTTYQAQPTYQALQTANI

LLPTNTQLDQSQKGTSGMTKSKITNQAYKNL

>primaurelia_RILP2

MNNSS-IPQLPQASIYEPTISIQKIQPHYRFDSNNMPRIQCYYHQDNPNNYIKYFCRQPECLMPLCDKCVQQHLTQYHTQ

TQSNIIPFETILSEIYQNLAADCNEMCDQINKIQQLSERTTTDKLVGKKSLYTNPTKLIESARDQVIAIVNNYFETLKTY

LLTQIEEPLPDINVKPAIKDLKLKWEQNIKDLESINNPVASIEKVIEYCEEELRKKNDTILNEAEKLIKMLETSTPQYRQ

YGVDIPQLFVDPSFLPRFLWVLERYAFFNRQPLEPEVLPPPRIIEPMPVYDI----PPPPRYYDPY-PPVDQVVYRDPIV

IREPVFRDSLIRENEYPEEMD-DANRQRRYRGRQQ---QYDYFPDNENDAY-FMKSVSKEKEKKRKSKVEE-SPKPVYKI

TEQYESQKKKKTNKSKGPKEIL-INH------NVSTTQLPQQQQQQYQ-----------NIQASTYQVQPTYQPLQTANI

LLQTNTQIDQSQKAPSGMTKSKITNQAYKNI

>primaurelia_RILP1

MNNTSSIPQLPQASIYEPTISVQKIQPHYRFDSNNMPKIQCYYHQDSPNNYIKYFCRQPECLMPLCDKCVQQHLNQYHTQ

TQSNIVPFETILSEIYQNLAADCNEMCDQINKIQSLSERTTTDKLVGKQSLQTNPIKLIESARDQVIAIVNNYFETLKTY

LLTQIEEPLPDINVKPALKDLKVRWEQNIKDLESINNPVASIEKVIEYCEEELRKKNDTILNEAEKLIKLLETSTPQYRQ

YGVDIPQLFVDPSFLPRFLWVLERYAFFNRPPLEPEVLPPPRIVEPIPVYDL----PPPPRYYDPY-PPMEQVVYRDPIV

IREPVFRDSLIRENEYPQDFDEDAYRQRRYRGRQQY--NFDYDLDNENDAY-NMKSETK--EKRRKSKVQE-SPKPRYKI

TEQYESKKKNKTSKSKGPKEIV-ISHAQPSYMNVTTTQIPQQTIYQPQ--------------QTTYQVQPTYQALQTANI

LLPTNNQLDQTQKAPSGMTKSKITNQAYKNL

>biaurelia_RILP2

MNNTS-IPQLPQASIYEPTISVQKIQPHYRFDSNNMPRIQCYYHQDNPNNYIKYFCRQPECLMPLCDKCVQQHLNQYHTQ

SQSNIVPFETILSEIYQNLAADCNEMCDQINKIQQLSERTTSDKLVGKQSLQTNPTKLIESARDQVIAIVNNYFETLKTY

LLTQIEEPLPDINVKPALKDLKVRWEQSIKDLESINNPVASIEKVIEYCEEELRKKNDTILNEAEKLIKLLETATPQYRQ

YGVDIPQLFVDPSFLPRFLWVLERYAFFNHPPLEPEVLPPPRIVEQIPVYDL----PPPPRYYDPY-PQMEQVIYRDPIV

IREPVFRDSLIRENEYPEDFD-DAYWQRRNRGRPQQ--QYDYFPDNENDVY-QVKSVSK--ERRRKSKE---SPKPRYKI

TEQYESQKKKKTNKSKGPKEIV-ISHAKPSYLNVTTTQLPQQTIYQPQ--------------QTTYQVQPTYQALPTSNV

LLPTNTQLDQTQKAPSGMTKSKITNQAYKNL

>novaurelia_RILP1

MNNSS-IPQLPQASIYEPTISVQKIQPHYRFDSNNMPRIQCYYHQDSPNNYIKYFCRQPECLMPLCDKCVQQHLNQYHTQ

SQSNIVPFETILSEIYQNLAADCNEMCDQINKIQQLSERTTTDKLVGKQSLQTNPTKLIESARDQVIAIVNNYFETLKTY

LLTQIEEPQPDINVKPALKDLKIRWEQNIKDLESINNPVASIEKVIEYCEEELRKKNDTILNDADKLIKILETATPQYRQ

YGVDIPQLFVDPSFLPRFLWVLERYAFFNRPPFEPEVLPPPRMVEPIPVYDL----PPPPRYYDPYPPPMEQVVYRDPIV

IREPVFRDSLIRENEYPEDFD-DAYWQRRNRGRQQQ--QYDYFPDNENEAY-QMKSVSK--EKKRKSKVQE-SPKPRYKV

TEQYESQKKKKTSKSKGPKEIV-ISHAQPSYLNVTTTQIPQQAIQQ-S----------------TYQVQPTYQALQTANV

LLPTNTQFEQTLKAPSGMTKSKITNQAYKNL

>novaurelia_RILP2

MNSTS-IPQLPQASIYEPTISIQKIQPHYRFDSNNMPRIQCYYHQDNPNNYIKYFCRQPECLMPLCDKCVQQHLNQYHTQ

SQSNIVPFETILSEIYQNLAADCNEMCDQINKIQQLSERSTTDKLVGKQSLQTNPIKLIESARDQVIAIVNNYFETLKTY

LLTQIEEPLPDLNVKPAIKDLKLRWEQNIKDLESINNPVASIEKVIEYCEEELRKKNDTILNEAEKLIKLLETSTPQYRQ

YGVDIPQLFVDPSFLPRFLWVLERYSFFNRPPQEPEFLPPPRIVEPIPVYDI----PPPPRYYDPY-PPMEQVVYRDPIV

IREPVFRDSLIRENEYQEDFD-DAYWQRRNRGRQQQ--QYDYFTDNENDAY-QMKSVSKEKEKRRKSKVQE-SPKPQYRI

TEQFESQKKKKTNKSKGPKEIV-ISHAQPSYINFTTTQLPQQQQQQYQ---QYQQQQYQPLQTSTYQAQPTYQALQTANI

LLPTNTQLDQTQKAPSGMTKSKITNQAYKNL

>biaurelia_RILP1

MNNSS-IPQLPQASIYEPTISIQKIQPHYRFDSNNMPRIQCYYHQDNPNNYIKYFCRQPECLMPLCDKCVQQHLNQYHTQ

SQSNIVPFETILSEIYQNLAADCNEMCDQINKIQQLSERSTTDKLVGKQSLQTNPIKLIESARDQVIAIVNNYFETLKTY

LLTQIEEPLPDLNVKPAIKDLKIRWEQNIKDLESINNPVASIEKVIEYCEEELRKKNDTILNEAEKLIKLLETTTPQYRQ

YGVDIPQLFVDPSFLPRFLWVLERYSFFNRPPLEPEILPPPRIVEHMPIYDI----PPPPRYYDPY-SPVEQVAYRDPIV

IREPVFRDSLIRENEYPEDFD-DAYWQRRNRGRPQQ--QYDFYPDNENDAY-QMKSVSK--EKRRKSKVQE-SPKPRYKI

TEQYESQKKKKTNKSKGPKEIV-ISHPQTSYMNVTTTQLPQQQ-YQPQ--------------PTTYQIQPTYQALQT-NV

LLPTNNQLDQTQKVPSGMTKSKITNQAYKNL

>tetraurelia_RILP1

MNNPS-IPQLPQASIYEPTISVQKIQPHYRFDSNNMPKIQCYYHQDSPNNYIKYFCRQPECLMPLCDKCVQQHLNQYHTQ

SQSNIVPFETILSEIYQNLAADCNEMCDQINKIQQLSERATSDKLVGKQSLQTNPTKLIESARDQVIAIVNNYFETLKTY

LLTQIEEPLPEINVKPAIKDMKFRWEQNIKDLESINNPAAAIEKVIEYCEEELRKKNDTILNEAEKLIKLLETTTPQYRQ

YGVDIPQLFVDPSFLPRFLWVLERYAFFNHPPMEPEVFPPPRIVEQIPVYDL----PPPPRYYDPY-PPMEQVIYRDPIV

IREPVFRDSLIRENEYPDDYD-DAYWQRRNRGRQQ---QYDYYPDNDNEAY-QMKSVSK--EKKRKSKVQDTSPQPLYKI

TEQYESQKKKKANKSKGPKEIV-ISHAQPSYINLTTTQLPQQQIYQPQ-------------QTTTYQVQPTYQALQTANI

LLPTNTQLDQSQKAPSGMTKSKITNQAYKNL

>octaurelia_RILP1

MNNTS-IPQLPQASIYEPTISIQKIQPHYRFDSNNMPRIQCYYHQDSPNNYIKYFCRQPECLMPLCDKCVQQHLNQYHTQ

SQSNIVPFETILSEIYQNLAADCNEMCDQINKIQQLSERTTTDKLVGKQSLQTNPTKLIESARDQVIAIVNNYFETLKTY

LLTQIEEPLPEINVKPAIKDMKLRWEQNIKDLESINNPQASIEKVIEYCEEELRKKNDTILNEAEKLIKLLEATTPQYRQ

YGVDIPQLFVDPSFLPRFLWVLERYAFFNHPPLEPEILPPPRIVEQIPVYDL----PPPPRYYDPY-PPMEQVIYRDPIV

IREPVFRDSLIRENEYPEDYD-DAYWQRRNRGRQQ---QYDYYPDNDNETY-QMKSVSK--EKKRKSKVQETSPQPRYKI

TEQYESQKKKKTNKSKGPKEIV-ISHAQPSYINLTTTQLPQQQVYQPQ-------------QTTTYQVQPTYQALQTANI

LLPTNTQLEQSQKAPSGMTKSKITNQAYKNL

>septaurelia_RILP1

MNNTS-IPQLPQASIYEPTISVQKIQPHYRFDSNNMPRIQCYYHQDSPNNYIKYFCRQPECLMPLCDKCVQQHLNQYHTQ

SQSNIVPFETILSEIYQNLAADCNEMCDQINKIQQLSERTTTDKLVGKQSLQTNPTKLIESARDQVIAIVNNYFETLKTY

LLTQIEEPLPEINVKPAIKDMKLRWEQNIKDLESINNPLASIEKVIEYCEEELRKKNDTILNEAEKLIKLLEATTPQYRQ

YGVDIPQLFVDPSFLPRFLWVLERYAFFNHPPLEPEILPPPRIVEQIPVYDL----PPPPRYYDPY-PQMEQVIYRDPIV

IREPVFRDSLIRENEYPEDYD-DAYWQRRNRGRQQ---QYDYYPDNDNETY-QMKSVSK--EKKRKSKVQETSPQPRYKI

TEQYESQKKKKTNKSKGPKEIV-ISHAQPSYINLTTTQLPQQQVYQPQ-------------QTTTYQVQPTYQALQTANI

LLPTNTQLEQSQKAPSGMTKSKITNQAYKNL

>tetraurelia_RILP2

-MNTS-IPQLPQASIYEPTISIQKIQPHYRFDSNNMPRIQCYYHQDNPNNYIKYFCRQPECLMPLCDKCVQQHLNQYHTQ

SQSNIVPFETILSEIYQNLAADCNEMCDQINKIQQLSERTTTDKLVGKQSLQTNPIKLIESARDQVIAIVNNYFDTLKTY

LLTQIEEPLPDLNVKPAIKDLKLRWEQNIKDLESINNPVASIEKVIEYCEEELRKKNDTILNEADKIIKLLETFTPQYRQ

YGVDIPQLFVDPTFLPRFLWVLERYAFFNRPPLEPEILPPPRVVEPMPVYDI----PPPPRYYDPY-PPMEQVVYRDPIV

IREPVFRDSLIRENEYPEEYD-DAYWQRRNRGRQQQ--QFDYYPDIENDAYQMKTSVSK--EKRRKSKVQE-SPKPKYKI

TEQYESQKKKKTNKSKGPKEIV-ISHATPSYINMTTTQIPQQ--YQPQ-------------QTTTQQVQPTYQALQTANI

LLPTNTQLDLTQKAPSGMTKSKITNQAYKNL

>decaurelia_RILP2

MNNTS-IPQLPQASIYEPTISIQKIQPHYRFDSNNMPRIQCYYHQDNPNNYIKYFCRQPECLMPLCDKCVQQHLNQYHTS

TQSNIVPFETILSEIYQNLAADCNEMCDQINKIQQLSERTTTDKLVGKQSLQTNPIKLIESARDQVIAIVNNYFDTLKTY

LLTQIEEPLPDLNVKPAIKDLKLRWEQNIKDLESINNPVASIEKVIEYCEEELRKKNDTILNEAEKLIKLLETSTPQYRQ

YGVDIPQLFVDPSFLPRFLWVLERYAFFNRPPLEPEILPPPRVVEPIPVYDI----PPPPRYYDPY-PPMEQVVYRDPVV

IREPVFRDSLIRENEYPEELD-DAYWQRRNRGRQQ---QFDYYPDIENDAY-QMKSVSK--EKRRKSKVQE-SPKPRYKI

TEQYESQKKKKTNKSKGPKEIV-ISHAQPSYINMTTTQIPQQ--YQPQ-------------QTTTYQVQPTYQALQTANI

LLPTNTQLDQTQKAPTGMTKSKITNQAYKNL

>dodecaurelia_RILP2

MNNTS-IPQLPQASIYEPTISIQKIQPHYRFDSNNMPRIQCYYHQDNPNNYIKYFCRQPECLMPLCDKCVQQHLNQYHSQ

TQSNIVPFETILSEIYQNLAADCNEMCDQINKIQQLSERTTTDKLVGKQSLQTNPIKLIESARDQVIAIVNNYFDTLKTY

LLTQIEEPLPDLNVKPAIKDLKIRWEQNIKDLESINNPVASIEKVIEYCEEELRKKNDTILNEAEKLIKLLETSTPQYRQ

YGVDIPQLFVDPSFLPRFLWVLERYAFFNRPPLEPEVLPPPRVVEPMPVYDI----PPPPRYYDPY-PPMEQVVYRDPIV

IREPVFRDSLIRENEYPEEFD-DAYWQRRNRGRQQQ--QYDYYPDNENDAY-QMKSVSK--EKRRKSKVQE-SPKPRYKI

TEQYESQKKKKTNKSKGPKEIV-ISHAQPSYINMTTTQIPQQ--YQPQ-------------QTTTYQVQPTYQALQTANI

LLPTNTQLDQTQKAPSGMTKSKITNQAYKNL

>octaurelia_RILP2

MNNTS-IPQLPQASIYEPTISIQKIQPHYRFDSNNMPRIQCYYHQDNPNNYIKYFCRQPECLMPLCDKCVQQHLNQYHTQ

TQSNIVPFETILSEIYQNLAADCNEMCDQINKIQQLSERTTTDKLVGKQSLQTNPIKLIESARDQVIAIVNNYFDTLKTY

LLTQIEEPLPDLNVKPAIKDLKLRWEQNIKDLESINNPVASIEKVIEYCEEELRKKNDTILNEAEKIIKLLETSTPQYRQ

YGVDIPQLFVDPTFLPRFLWVLERYAFFNRPPLEPEVLPPPRVVEPMPVYDI----PPPPRYYDPY-PPMEQVVYRDPIV

IREPVFRDSLIRENEYPEEFD-DAYWQRRNRGRQQQ--QFDYYPDNENDAYQIKSSVSK--EKRRKSKVQE-SPKPRYKI

TEQYESQKKKKTNKSKGPKEIV-ISHAQPSYINLTTTQIPQQ--YQPQ-------------QTTTYQVQPTYQALQTANI

LLPTNTQLDQTQKAPSGMTKSKITNQAYKNL

>septaurelia_RILP2

MNNTS-IPQLPQASIYEPTISIQKIQPHYRFDSNNMPRIQCYYHQDNPNNYIKYFCRQPECLMPLCDKCVQQHLNQYHTQ

TQSNIVPFETILSEIYQNLAADCNEMCDQINKIQQLSERTTTDKLVGKQSLQTNPIKLIESARDQVIAIVNNYFDTLKTY

LLTQIEEPLPDLNVKPAIKDLKLRWEQNIKDLESINNPVASIEKVIEYCEEELRKKNDTILNEAEKIIKLLETSTPQYRQ

YGVDIPQLFVDPTFLPRFLWVLERYAFFNRPPLEPEVLPPPRVVEPMPVYDI----PPPPRYYDPY-PPMEQVVYRDPIV

IREPVFRDSLIRENEYPEEFD-DAYWQRRNRGRQQQ--QFDYYPDNENDAYQIKSSVSK--EKRRKSKVQE-SPKPRYKI

TEQYESQKKKKTNKSKGPKEIV-ISHAQPSYINLTTTQIPQQ--YQPQ-------------QTTTYQVQPTYQALQTANI

LLPTNTQLDQTQKAPSGMTKSKITNQAYKNL

>decaurelia_RILP1

MNNTSSIPQLPQVSIYEPTISIQKIQPHYRFDSNNMPKIQCYYHQDSPNNYIKYFCRQPECLMPLCDKCVQQHLNQYHTQ

TQSNIVPFETILSEIYQNLAADCNEMCDQINKIQQLSERTTTDKLVGKQSLQTNPIKLIESARDQVIAIVNNYFETLKTY

LLTQIDEPLPDINVKPAIKDLKLRWEQNIKDLESINNPVASIEKVIEYCEEELRKKNDTILNEAEKLIKLLETTTPQYRQ

YGVDIPQLFVDPSFLPRFLWVLERYAFFNHPPLEPEVLPPPRIVEPIPVYDL----PPPPRYYDPY-PPMEQVIYRDPIV

IREPVFRDSLIRENEYPEDYD-DAYWQRRNRGRQ----QYDYYPENENDAY-QMKSVSK--EKRRKSKVQE-SPKPRYKI

TEQYETQKKKKTSKSKGPKEIV-ISHAQPSYINLTTTQLPQQPIYQPQ-------------QTTTYQVQPTYQALQTANI

LLPTNTQLAQSQKAPSGMTKSKITNQAYKNL

>dodecaurelia_RILP1

MNNTS-IPQLPQASIYEPTISVQKIQPHYRFDSNNMPKIQCYYHQDSPNNYIKYFCRQPECLMPLCDKCVQQHLNQYHTQ

TQSNIVPFETILSEIYQNLAADCNEMSDQINKIQQLSERTTTDKLVGKQSLQTNPIKLIESARDQVIAIVNNYFETLKTY

LLTQIDEPLPDINVKPAIKDLKLRWEQNIKDLESINNPVAAIEKVIEYCEEELRKKNDTILNEADKLIKLLETTTPQYRQ

YGVDIPQLFVDPSFLPRFLWVLERYAFFNHPPLEPEVLPPPRIVEQIPVYDL----PPPPRYYDPY-PPMEQVIYRDPIV

IREPVFRDSLIRENEYPEDYD-DAYWQRRNRGRQQQ--QYDYYPDNENEAY-QMKSVSK--EKRRKSKVQE-SPKPRYKI

TEQYESQKKKKTSKSKGPKEIV-ISHAQPSYINLTTTQLPQQPIYQPQ-------------QTTTYQVQPTYQALQTANI

LLPTNTQLDQSQKVPSGMTKSKITNQAYKNL

**Figure S5.** The alignment of RILP protein sequences used to analyze RILP amino acid sequence conservation.
